# Supplementary material
Source: PubMed Central journal article supplement (PMC3845662)

Supporting Information for:

## **Development of a Capillary Electrophoresis Platform for Identifying Inhibitors of Protein-Protein Interactions**

Jennifer N. Rauch<sup>1,¶</sup>, Jing Nie<sup>2,¶</sup>, Tonia J. Buchholz<sup>3</sup>, Jason E. Gestwicki<sup>1,3</sup>, Robert T. Kennedy<sup>2,\*</sup>

Departments of Biological Chemistry<sup>1</sup>, Chemistry<sup>2</sup> and the Life Sciences Institute<sup>3</sup>

University of Michigan

Ann Arbor, MI 48109

¶ these authors contributes equally

\*Corresponding author:

Tel: 734-615-4363.

Fax: 745-615-6462.

Email: [rtkenn@umich.edu](mailto:rtkenn@umich.edu).

<sup>†</sup>Department of Chemistry. <sup>‡</sup>Department of Pharmacology.

Supporting Information:

Figure S-1. ATPase activity of Hsp70-488 compared to Hsp70

Figure S-2. Isothermal calorimetry measurement of binding affinity between Hsp70 and Bag3

Figure S-3. Dose response curves for Hsp70-Bag3 inhibitors identified by CE and FCPIA and cross-testing.

Figure S-4. Correlation of IC50s by CE and FCPIA for confirmed inhibitors

**Figure S1.** ATPase activity of Hsp70 is unaffected by labeling as shown by the lack of difference between Hsp70 and labeled Hsp70 (Hsp70-488) activity. (A) ATPase stimulation by the Hsp70 co-chaperone J protein. (B) Bag3 effect on Hsp70/J protein ATPase stimulation.

**A**

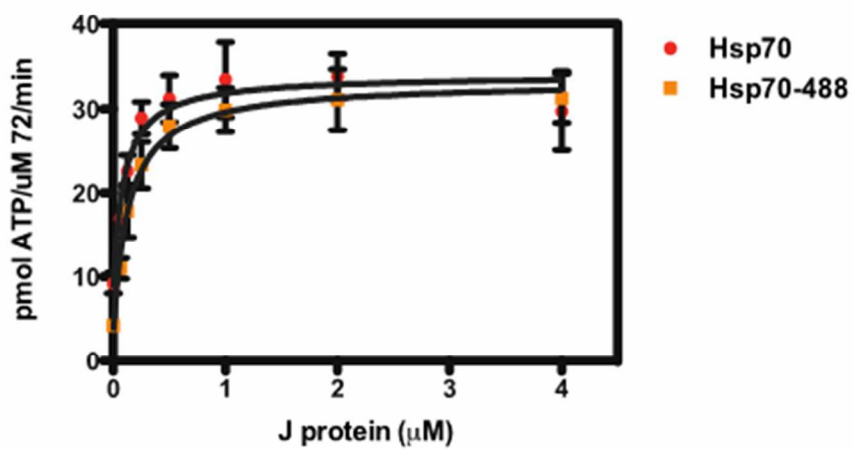

**B**

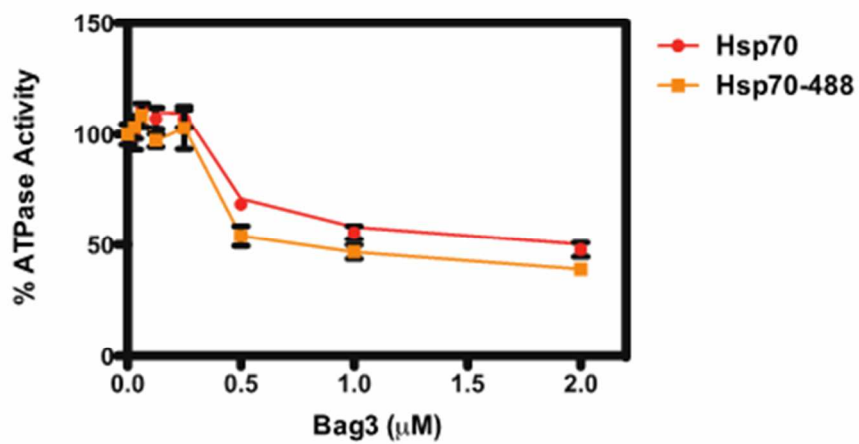

**Figure S2.** Calorimetric isothermal-titration measurement of Bag3 interaction Hsp70. Both proteins are unlabeled so this measurement is native proteins yet yields a similar  $K_D$  to the CE method using labeled Hsp70.

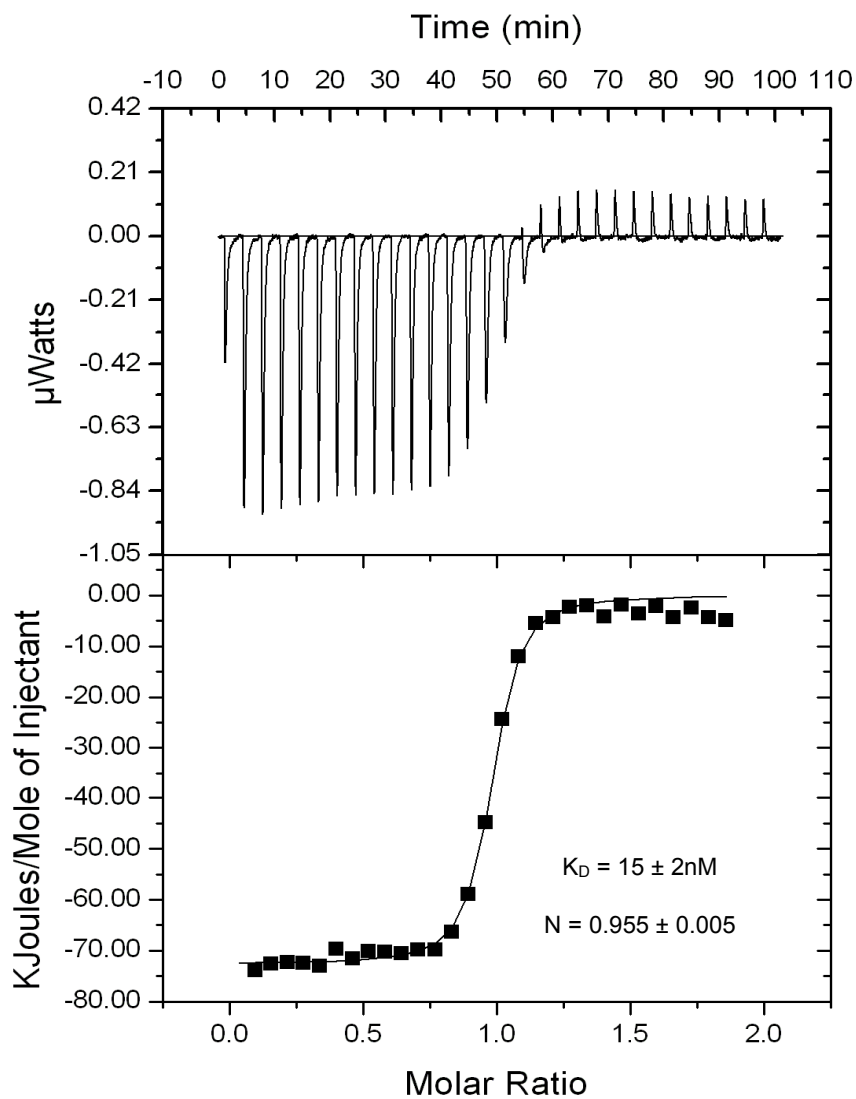

**Figure S3.** DRCs of confirmed FCPIA hits using (A) CE, (B) FCPIA and CE hits using (C) CE, (D) FCPIA. Only 4 compounds are shown (A) because other FCPIA hits showed no activity at 100  $\mu\text{M}$  in the CE assay. Error bars are the range for two replicates.

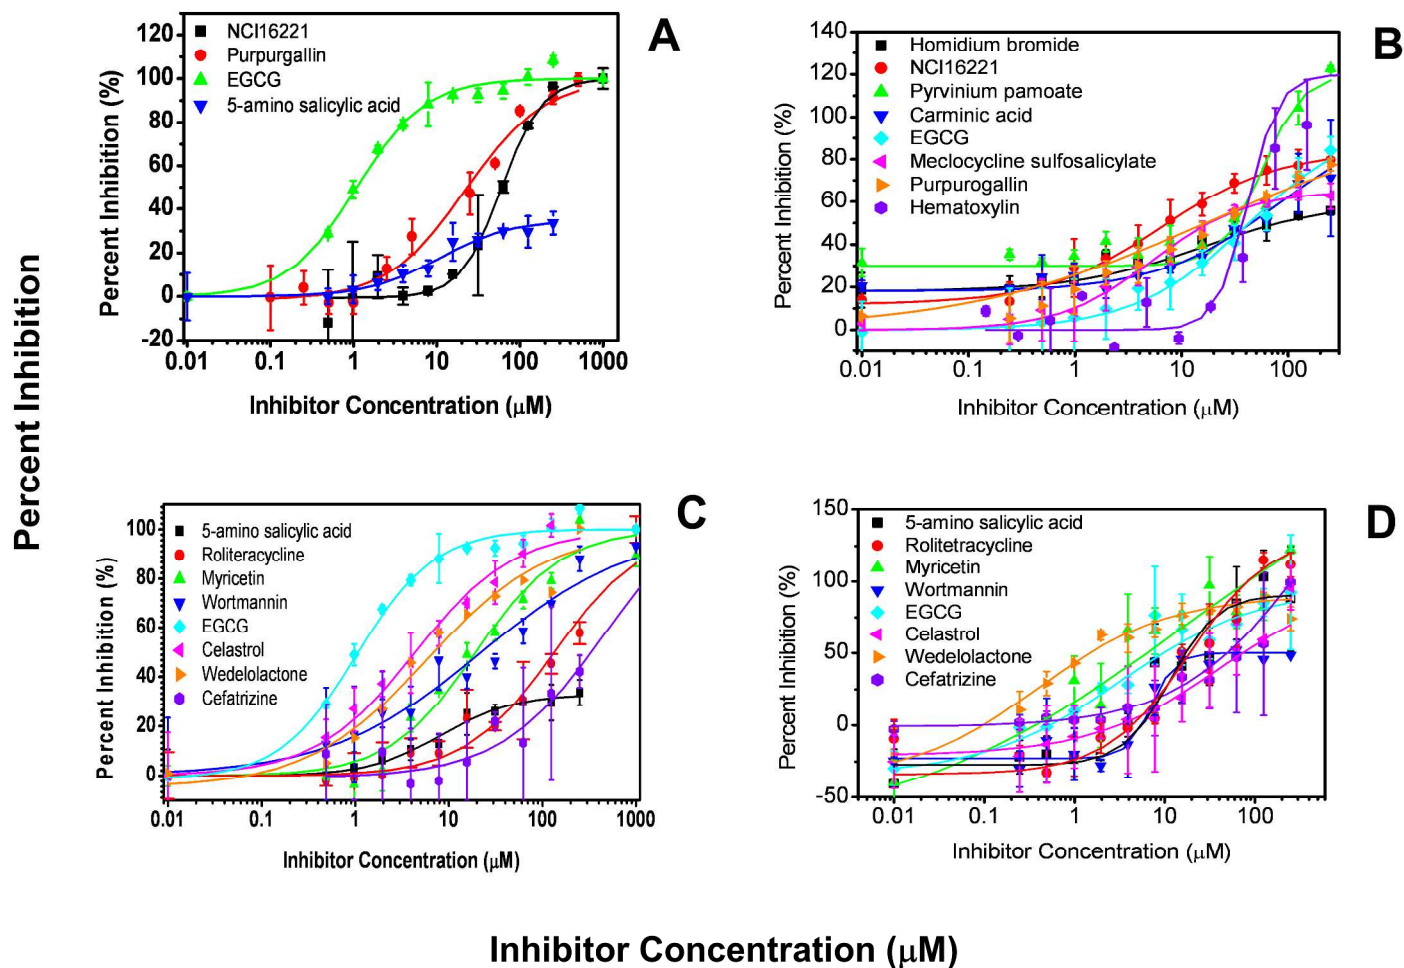

**Figure S4.** Comparison of IC50s found by CE and FCPIA. Only compounds that gave IC50 < 400  $\mu$ M by both methods were used. Error bars are the range for two replicates.

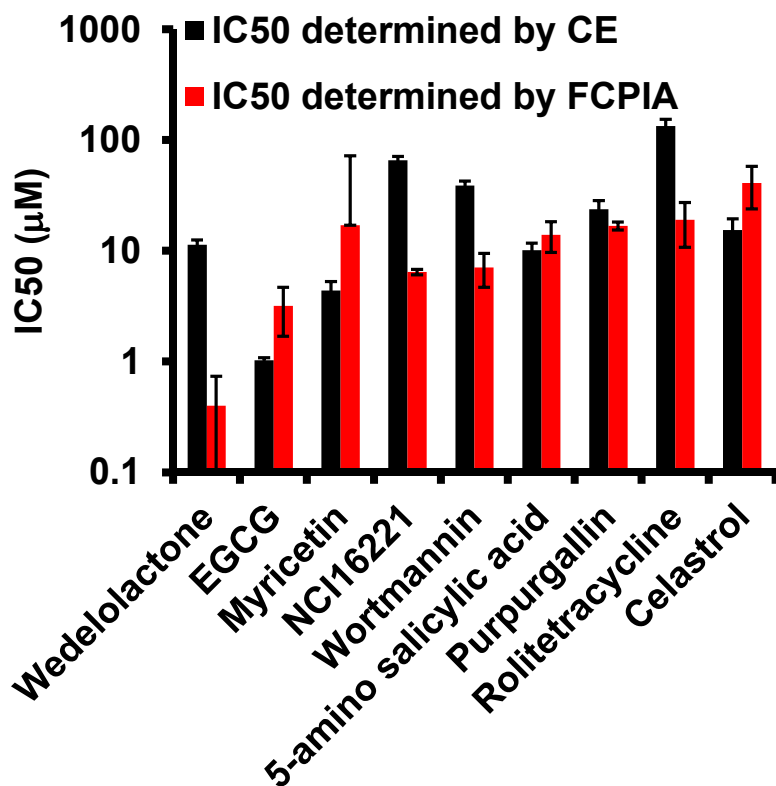

Supplement: NIHMS523606-supplement-1_si_001.pdf [file NIHMS523606-supplement-1_si_001.pdf]
